# Supplementary material for: Surface-enhanced Raman scattering (SERS) as a probe for detection of charge-transfer between TiO2 and CdS nanoparticles
Source: Royal Society of Chemistry journal article supplement (doi:10.1039/c8nj04003f), 2018-11-20
Supplement: c8nj04003f1.pdf [file c8nj04003f1.pdf]

## Supporting Information

### **Surface-Enhanced Raman Scattering (SERS) as Probe for Detection of Charge Transfer Between TiO<sub>2</sub> and CdS Nanoparticles**

Lin Guo,<sup>a</sup> Xiaolei Zhang,<sup>a</sup> Peng Li,<sup>a</sup> Rui Han,<sup>a</sup> Yawen Liu,<sup>a</sup> Xiaoxia Han,<sup>a</sup> and Bing Zhao\*<sup>a</sup>

<sup>a</sup>State Key Laboratory of Supramolecular Structure and Materials, Jilin University,  
Changchun 130012, P. R. China

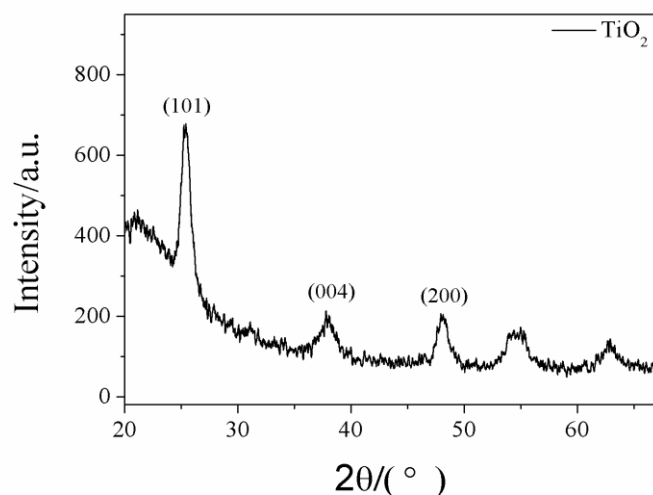

Figure S1. XRD pattern of TiO<sub>2</sub> nanoparticles.

XRD is usually used for identification of the crystal phase structure and estimation of crystallite size for nanoparticles (NPs). The XRD peaks at  $2\theta = 25.4^\circ$  (101) and  $48^\circ$  (200) are generally identified as the characteristic diffraction peaks of the anatase crystal phase of TiO<sub>2</sub>,<sup>1</sup> which usually holds high surface performance.<sup>2</sup> Figure S1. shows the XRD pattern of TiO<sub>2</sub> NPs. As-prepared TiO<sub>2</sub> NPs exhibits a pure anatase phase with relatively good crystallinity. All XRD peaks are comparatively wide, which is a typical characteristic of nanometer materials. The crystallite size  $D$  of the sample is about 8.6 nm, which was estimated from the half band width ( $\beta$ ) of the corresponding X-ray spectral peak by the Scherrer formula<sup>1</sup>:  $D = k\lambda/(\beta\cos\theta)$ .

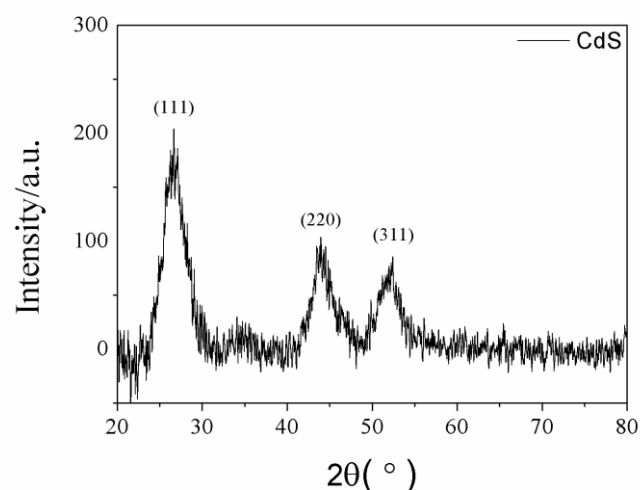

Figure S2. XRD pattern of CdS nanoparticles.

The XRD peaks at  $2\theta = 26.5^\circ$  (111),  $43.9^\circ$  (220) and  $51.9^\circ$  (311) are generally identified as the characteristic diffraction peaks of the cubic system of CdS.<sup>3</sup> Figure S2. shows the XRD pattern of CdS NPs. All XRD peaks are comparatively wide, which is a typical characteristic of nanometer materials. The crystallite size  $D$  of the sample is about 5.4 nm, which was estimated from the half band width ( $\beta$ ) of the corresponding X-ray spectral peak by the Scherrer formula<sup>1</sup>:  $D = k\lambda/(\beta\cos\theta)$ .

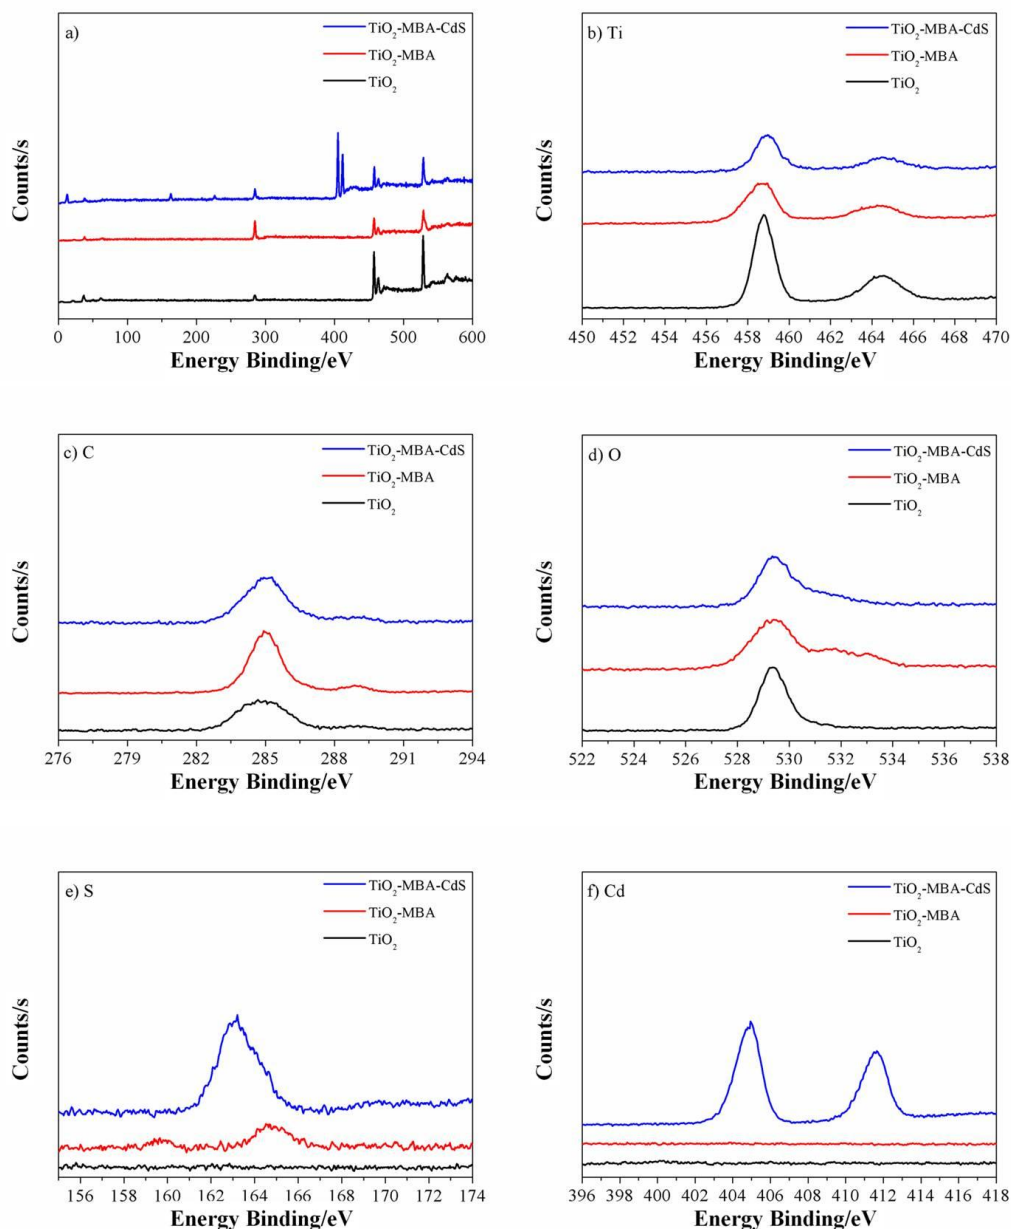

Figure S3. The XPS of the  $\text{TiO}_2$ -CdS systems, a) full spectrum, b) Ti, c) C, d) O, e) S, f) Cd.

To further identify the elemental composition and chemical state of  $\text{TiO}_2/\text{MBA}/\text{CdS}$  charge-transfer system, XPS measurements were carried out. Figure S3. shows that Ti, C, O, S, Cd elements exist on the surface of the charge-transfer systems. The peaks at 458.8 eV and 464.4 eV are assigned to  $\text{Ti}2p_{3/2}$  and  $2p_{1/2}$  (Figure 3b), the doublet separation between the  $2p_{1/2}$  and  $2p_{3/2}$  peaks of  $\sim 5.6$  eV is characteristic of  $\text{Ti}^{4+}$ . And the peak at 284.7 eV is assigned to C (Figure S3c). The peak at 529.3 eV (Figure S3d) is assigned to  $\text{O}1s$ , which shows the oxygen is bound to tetravalent Ti ions and it means that the surface is partly covered with  $-\text{COOH}$

groups from the small peak at 531.6 eV. Compared with system  $\text{TiO}_2$  in Figure S3e, the systems  $\text{TiO}_2/\text{MBA}$  and  $\text{TiO}_2/\text{MBA}/\text{CdS}$  have sulfur element which be attributed to  $-\text{SH}$  of MBA molecule and CdS NPs are introduced subsequently. The Cd3d photoelectron (Fig S3f) shows a  $\text{Cd}3d_{5/2}$  peak at 405.1 eV and a  $3d_{3/2}$  peak at 411.6 eV in  $\text{TiO}_2/\text{MBA}/\text{CdS}$  system.

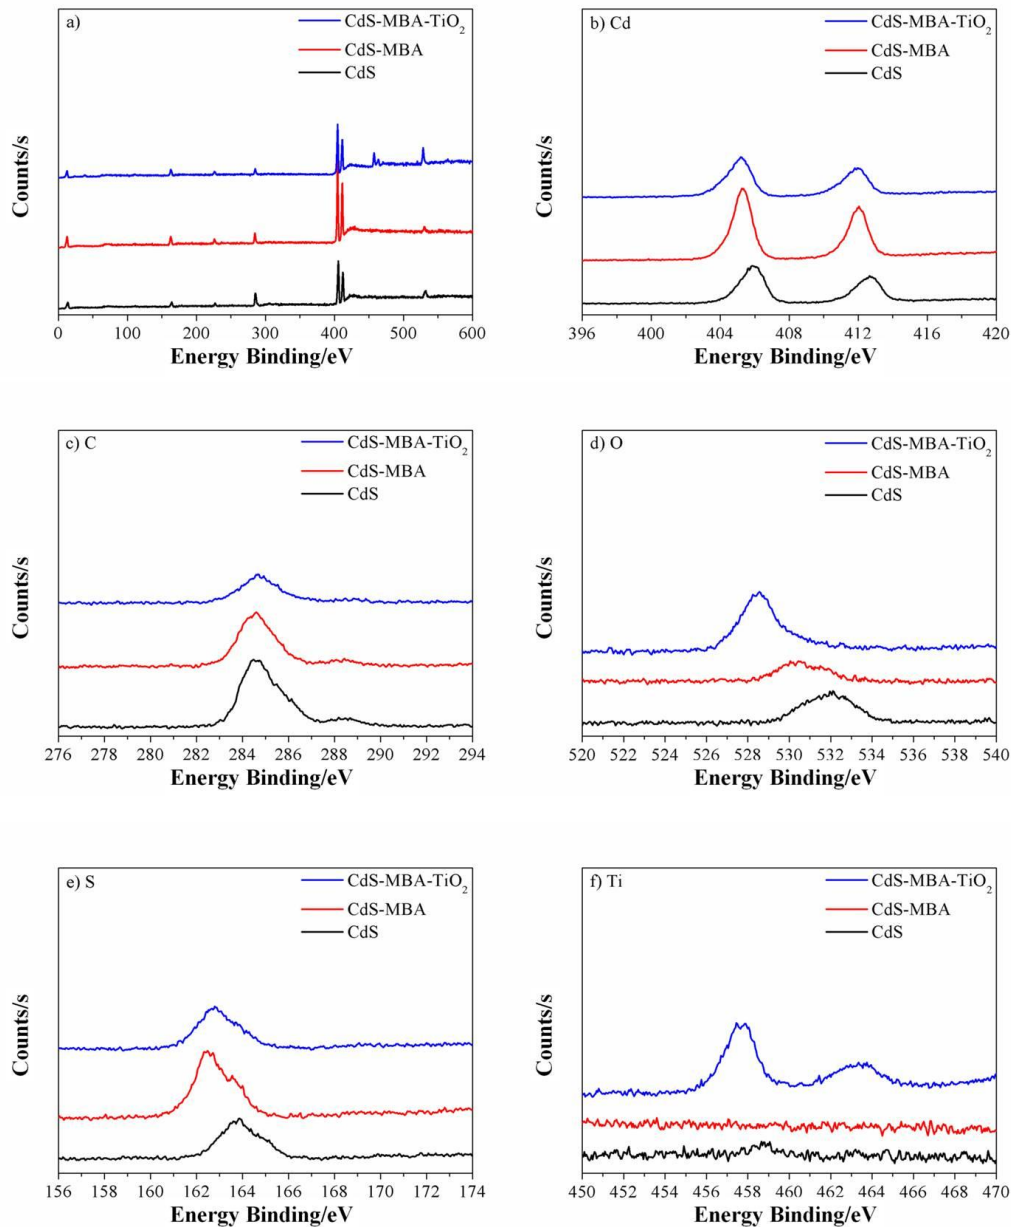

Figure S4. The XPS of the CdS-TiO<sub>2</sub> systems, a)full spectrum, b) Cd, c) C, d) O, e) S, f) Ti.

Figure S4. shows that Cd, C, O, S, Ti elements exist on the surface of the charge-transfer systems. The peaks at 405.8eV and 412eV are assigned to Cd3d<sub>5/2</sub> and 3d<sub>3/2</sub>(Figure S4b), the doublet separation between the 3d<sub>5/2</sub> and 3d<sub>3/2</sub> peaks of ~6.2 eV is characteristic of Cd<sup>2+</sup>. And the peak at 284.6eV is assigned to C (Figure S4c). The peak of CdS at 532.1eV (Figure S4d) is assigned to O1s, which may be attributed to the residual of nitrate ions in the process of synthesizing CdS. The peak of CdS/MBA at 530.4eV and CdS/MBA/TiO<sub>2</sub> at 528.6 are assigned to O1s which be attributed to MBA and TiO<sub>2</sub> are introduced subsequently. Compared with system CdS

in Figure S4e, the systems CdS/MBA and CdS/MBA/TiO<sub>2</sub> have sulfur element which be attributed to -SH of MBA molecule is introduced subsequently. The peaks at 457.8eV and 463.4eV are assigned to Ti2p<sub>3/2</sub> and 2p<sub>1/2</sub>(Figure S4f).

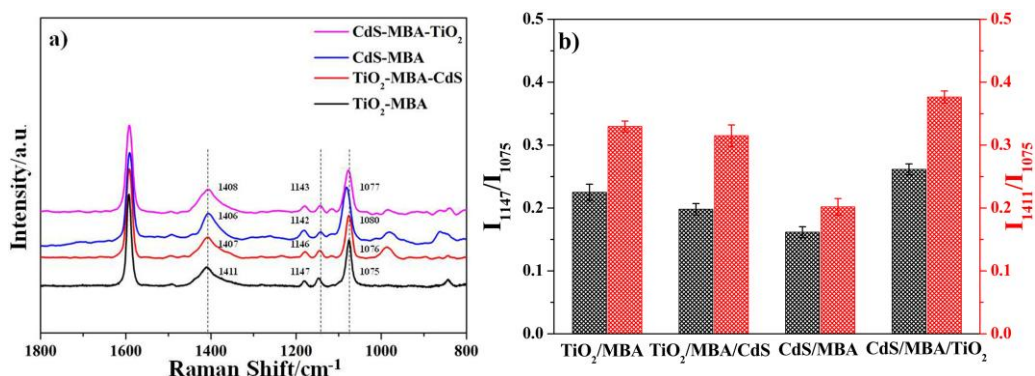

Figure S5. a) SERS spectra of TiO<sub>2</sub>/MBA, TiO<sub>2</sub>/MBA/CdS, CdS/MBA and CdS/MBA/TiO<sub>2</sub> systems at 785 nm excitation; b) The SERS intensity ratio of the modes 1147 and 1075 cm<sup>-1</sup> as well as 1411 and 1075 cm<sup>-1</sup> in four systems.

Figure S5. presents the SERS spectrum of TiO<sub>2</sub>-MBA, TiO<sub>2</sub>-MBA-CdS, CdS-MBA and CdS-MBA-TiO<sub>2</sub> under the excitation of 785 nm laser. The histogram showed the peak intensities at 1147 cm<sup>-1</sup> and 1411 cm<sup>-1</sup> (b2 mode) relative to 1075 cm<sup>-1</sup> (a1 mode) in these four kinds of assemblies. Similar to the situation of 633 nm excitation, in CdS-MBA-TiO<sub>2</sub> system, the b2 mode greatly enhanced compared to TiO<sub>2</sub>-MBA-CdS system.

## References

1. Q. H. Zhang, L. Gao, J. K. Guo, Effect of calcination on the photocatalytic properties of nanosized TiO<sub>2</sub> powders prepared by TiCl<sub>4</sub> hydrolysis, *Appl. Catal. B*, 2000, **26**, 207-215.
2. K. Wilke, H. D. Breuer, The influence of transition metal doping on the physical and photocatalytic properties of titania, *J. Photochem. Photobiol. A: Chem.* 1999, **121**, 49-53.
3. H. Zhang, X. Y. Ma, J. Xu, Directional CdS nanowires fabricated by chemical bath deposition, *Journal of Crystal Growth*, 2002, **246**, 108-112.
